# Supplementary material for: In Vitro Effects of Concomitant Use of Herbal Preparations on Cytochrome P450s Involved in Clozapine Metabolism
Source: MDPI journal article supplement (doi:10.3390/molecules21050597), 2016-05-06
Supplement: s1 [file s1]

# Supplementary Materials: *In-Vitro* Effects of Concomitant Use of Herbal Preparations on Cytochrome P450s Involved in Clozapine Metabolism

Wei Wang, Dan-Dan Tian and Zhang-Jin Zhang

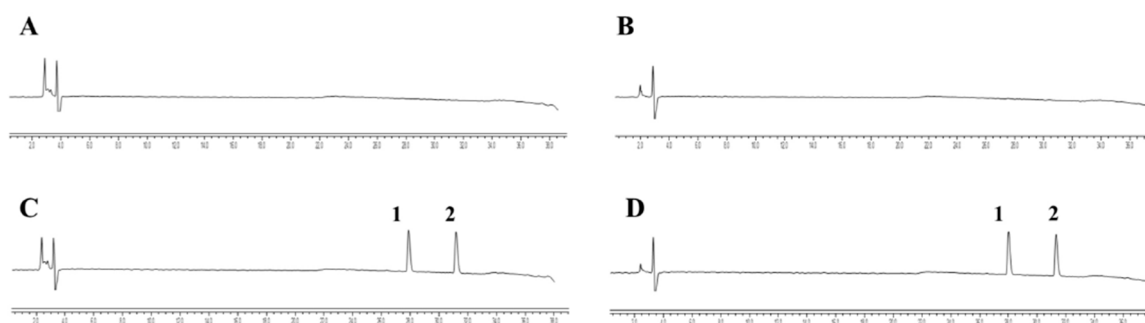

**Figure S1.** Representative HPLC chromatographic profiles: (A) blank-HLM reaction system. (B) blank-mixed rCYPs reaction system. (C) norCLZ and CLZ *N*-oxide-HLM reaction system. (D) norCLZ and CLZ *N*-oxide - mixed rCYPs reaction system. 1, norCLZ; 2, CLZ *N*-oxide.
